# Supplementary material for: Phthalates Are Metabolised by Primary Thyroid Cell Cultures but Have Limited Influence on Selected Thyroid Cell Functions In Vitro
Source: PubMed Central journal article supplement (PMC4795645; doi:10.1371/journal.pone.0151192), 2016-03-17
Supplement: pone.0151192.s005.pdf [file pone.0151192.s005.pdf]

**S2 Table. The impact of TSH-starvation (A) and addition of FBS (B) during experiments.**

| <b>A.</b>               | <b>Outcome variables</b> | <b>p-value</b> | <b>Transformation used</b> | <b>n</b> | <b>Mean of differences (95 %CI mean)</b> |
|-------------------------|--------------------------|----------------|----------------------------|----------|------------------------------------------|
| Unstimulated cultures   | cAMP                     | 0.09           | no                         | 8        | -                                        |
|                         | Tg                       | 0.1            | no                         | 7        | -                                        |
|                         | Tg mRNA                  | 0.21           | no                         | 6        | -                                        |
|                         | TPO mRNA                 | 0.28           | no                         | 6        | -                                        |
|                         | NIS mRNA                 | 0.13           | log10                      | 6        | -                                        |
|                         | TSHr mRNA                | 0.15           | no                         | 6        | -                                        |
|                         | IL-6 mRNA                | 0.59           | no                         | 6        | -                                        |
| TSH-stimulated cultures | cAMP                     | 0.03           | no                         | 8        | 0.60 (0.07;11.25)                        |
|                         | Tg                       | 0.9            | no                         | 8        | -                                        |
|                         | Tg mRNA                  | 0.11           | no                         | 6        | -                                        |
|                         | TPO mRNA                 | 0.52           | no                         | 6        | -                                        |
|                         | NIS mRNA                 | 0.83           | no                         | 6        | -                                        |
|                         | TSHr mRNA                | 0.80           | no                         | 6        | -                                        |
|                         | IL-6 mRNA                | 0.31           | no                         | 6        | -                                        |
| <b>B.</b>               |                          |                |                            |          |                                          |
| Unstimulated cultures   | cAMP                     | 0.42           | no                         | 3        | -                                        |
|                         | Tg                       | 0.36           | no                         | 3        | -                                        |
| TSH-stimulated cultures | cAMP                     | 0.04           | no                         | 3        | 0.93 (0.16;16.97)                        |
|                         | Tg                       | 0.22           | no                         | 3        | -                                        |

Footnote S2 Table: Results of the outcome variables were analysed by paired T-test and experiment duration was 72 h.

A: outcome from experiments with thyroid stimulation hormone (TSH) -starvation are compared to those without TSH-starvation.

B: outcome from experiments without foetal bovine serum (FBS) are compared to those with FBS. Experiments were conducted in triplicates. cAMP: 3'-5'-cyclic adenosine monophosphate. IL: interleukin. NIS: sodium iodine symporter. Tg: thyroglobulin. TPO: thyroid peroxidase. TSHr: thyroid stimulating hormone receptor.
